# Supplementary material
Source: HighWire-hosted journal article supplement (https://fg.bmj.com/content/7/4/257)
Supplement: inline-supplementary-material-1 [file inline-supplementary-material-1.pdf]

**Supplementary Table 1 – The Glasgow Blatchford Score**

| <b>Risk Marker</b>                    | <b>Score component value</b> |
|---------------------------------------|------------------------------|
| <b>Blood urea (mmol/L)</b>            |                              |
| >7 <8                                 | 2                            |
| >8 <10                                | 3                            |
| >10 <25                               | 4                            |
| ≥25                                   | 6                            |
| <b>Haemoglobin (g/L) for men</b>      |                              |
| >120 <130                             | 1                            |
| >100 <120                             | 3                            |
| <100                                  | 6                            |
| <b>Haemoglobin (g/L) for women</b>    |                              |
| ≥100 <120                             | 1                            |
| <100                                  | 6                            |
| <b>Systolic blood pressure (mmHg)</b> |                              |
| 100-109                               | 1                            |
| 90-99                                 | 2                            |
| <90                                   | 3                            |
| <b>Other markers</b>                  |                              |
| Pulse ≥100 (per min)                  | 1                            |
| Presentation with melaena             | 1                            |
| Presentation with syncope             | 2                            |
| Hepatic disease                       | 2                            |
| Cardiac failure                       | 2                            |

**Supplementary Table 2. The Post-Endoscopic Complete Rockall score**

| <b>Component</b>                      | <b>Detail</b>                                    | <b>Score</b> |
|---------------------------------------|--------------------------------------------------|--------------|
| <b>AGE</b>                            | <60                                              | 0            |
|                                       | 60-79                                            | 1            |
|                                       | >80                                              | 2            |
| <b>SHOCK</b>                          |                                                  |              |
| No shock                              | Pulse <100                                       | 0            |
|                                       | SBP>100                                          |              |
| Tachycardia                           | Pulse>100                                        | 1            |
|                                       | SBP>100                                          |              |
| Hypotension                           | SBP<100                                          | 2            |
| <b>COMORBIDITY</b>                    |                                                  |              |
|                                       | None                                             | 0            |
|                                       | IHD, CCF, etc                                    | 2            |
|                                       | Renal or liver failure, or metastatic malignancy | 3            |
| <b>ENDOSCOPIC DIAGNOSIS</b>           |                                                  |              |
|                                       | Mallory-Weise lesion or nothing                  | 0            |
|                                       | All other lesions                                | 1            |
|                                       | Malignant lesion                                 | 2            |
| <b>STIGMATA OF RECENT HAEMORRHAGE</b> |                                                  |              |
|                                       | None                                             | 0            |
|                                       | Blood, clot, vessel                              | 2            |

**Supplementary Table 3. Charlson's Weighted Index of Comorbidity\***

| <b>Condition</b>                  | <b>Assigned Weight</b> |
|-----------------------------------|------------------------|
| Myocardial infarction             | 1                      |
| Congestive heart failure          | 1                      |
| Peripheral vascular disease       | 1                      |
| Cerebrovascular disease           | 1                      |
| Dementia                          | 1                      |
| Chronic pulmonary disease         | 1                      |
| Connective tissue disease         | 1                      |
| Ulcer disease                     | 1                      |
| Liver disease mild                | 1                      |
| Diabetes                          | 1                      |
| Hemiplegia                        | 2                      |
| Renal disease moderate or severe  | 2                      |
| Diabetes with end organ damage    | 2                      |
| Any malignancy                    | 2                      |
| Leukaemia                         | 2                      |
| Malignant lymphoma                | 2                      |
| Liver disease. moderate or severe | 3                      |
| Metastatic solid malignancy       | 6                      |
| AIDS                              | 6                      |

\*: Please use the Charlson Score Calculator with age correction. Macros & ActiveX need to be enabled, when prompted, for the calculator to function

**Table 4. The performance of risk scoring systems in patients stratified according to age**

|                                                    | <b>Age group</b> | <b>ATD</b>         | <b>Non-ATD</b>     | <b>P-value<br/>ATD v non-ATD</b> |
|----------------------------------------------------|------------------|--------------------|--------------------|----------------------------------|
| <b>No. of patients</b>                             | All              | n=851              | n=1220             |                                  |
|                                                    | <67              | n=210              | n=867              |                                  |
|                                                    | 67+              | n=641              | n=353              |                                  |
| <b>Age median (IQR)</b>                            | All              | 75 (67-82)         | 53 (39-69)         |                                  |
|                                                    | <67              | 59 (51-63)         | 45 (33-56)         |                                  |
|                                                    | 67+              | 79 (73-83)         | 77 (71-82)         |                                  |
| <b>AUC (95%CI) for<br/>Transfusion/ Blatchford</b> | All              | 0.85 (0.82 - 0.88) | 0.90 (0.88 - 0.92) | 0.003                            |
|                                                    | <67              | 0.88 (0.83 - 0.93) | 0.93 (0.90 - 0.95) | 0.13                             |
|                                                    | 67+              | 0.84 (0.80 - 0.87) | 0.84 (0.79 - 0.89) | 1.00                             |
| <b>P-value (&lt;67 v 67+)</b>                      |                  | 0.14               | 0.002              |                                  |
| <b>AUC (95%CI) for<br/>Surgery/ Rockall</b>        | All              | 0.73 (0.59 - 0.87) | 0.74 (0.63 - 0.86) | 0.88                             |
|                                                    | <67              | 0.82 (0.73 - 0.92) | 0.90 (0.81 - 0.98) | 0.27                             |
|                                                    | 67+              | 0.77 (0.54 - 1.00) | 0.41 (0.19 - 0.62) | 0.022                            |
| <b>P-value (&lt;67 v 67+)</b>                      |                  | 0.68               | <0.001             |                                  |
| <b>AUC (95%CI) for<br/>Death/ Charlson</b>         | All              | 0.73 (0.65 - 0.80) | 0.84 (0.78 - 0.90) | 0.021                            |
|                                                    | <67              | 0.89 (0.76 - 1.01) | 0.92 (0.87 - 0.96) | 0.65                             |
|                                                    | 67+              | 0.70 (0.61 - 0.78) | 0.74 (0.64 - 0.85) | 0.95                             |
| <b>P-value (&lt;67 v 67+)</b>                      |                  | 0.79               | 0.003              |                                  |
| <b>Rs (95%CI) for<br/>Length of stay/ Rockall</b>  | All              | 0.32 (0.26-0.38)   | 0.48 (0.43-0.52)   | <0.001                           |
|                                                    | <67              | 0.30 (0.17-0.42)   | 0.43 (0.37-0.48)   | 0.052                            |
|                                                    | 67+              | 0.26 (0.18-0.33)   | 0.23 (0.12-0.32)   | 0.58                             |
| <b>P-value (&lt;67 v 67+)</b>                      |                  | 0.56               | <0.001             |                                  |
